# Supplementary material for: Peculiar phenomena of structural transformations triggered from a nickel coordination polymer
Source: Royal Society of Chemistry journal article supplement (doi:10.1039/c4ce02333a), 2015-01-01
Supplement: c4ce02333a1.pdf [file c4ce02333a1.pdf]

## Supporting Information

### **Peculiar Phenomena on Structural Transformation Triggered from A Nickel Coordination Polymer**

Meng Kang, Guo-Ping Yang, Lei Hou, Wei-Ping Wu, Yun-Long Wu, Yao-Yu Wang\*

*Key Laboratory of Synthetic and Natural Functional Molecule Chemistry of the  
Ministry of Education, Shaanxi Key Laboratory of Physico-Inorganic Chemistry,  
College of Chemistry & Materials Science, Northwest University, Xi'an 710069, P. R.  
China.*

*E-mail: [wyaoyu@nwu.edu.cn](mailto:wyaoyu@nwu.edu.cn).*

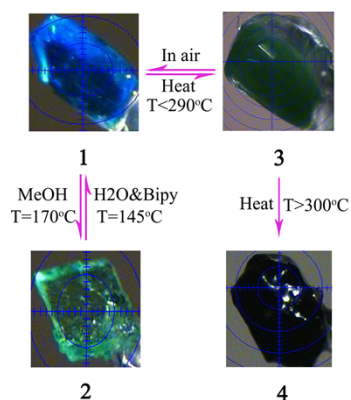

**Fig. S1** View of the color changes of the four nickel-based CPs via structural transformation.

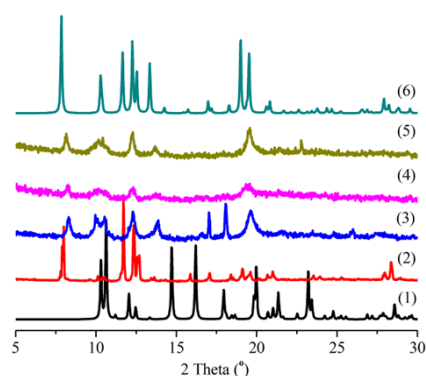

**Fig. S2** View of the transformations of **1** to **2** in various solvents: PXRD patterns of as-simulated **1** (1), the activation of **1** at 170 °C in methanol (2), ethanol (3), *N,N'*-dimethylformamide (4) and acetonitrile (5), and as-simulated **2** (6).

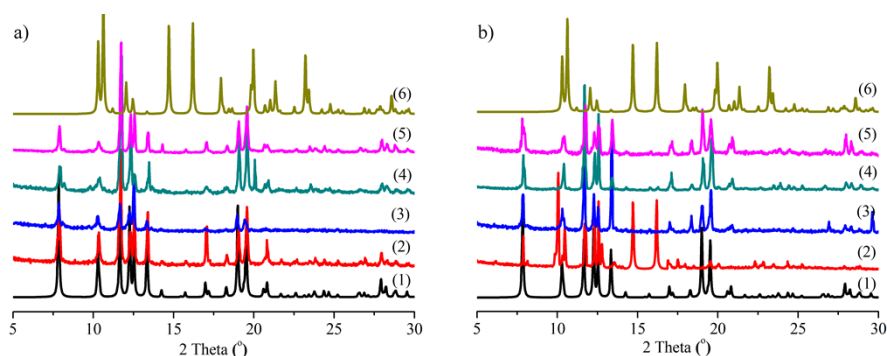

**Fig. S3** View of the water-mediated transformation of **2** to **1** under the condition of adding bipy ligand: PXRD patterns of as-simulated **2** (1), the activation of **2** (a2) / **2&bipy** (b2) at 145 °C in water, methanol (3), acetonitrile (4) and *N,N'*-dimethylformamide (5), and as-simulated **1** (6).

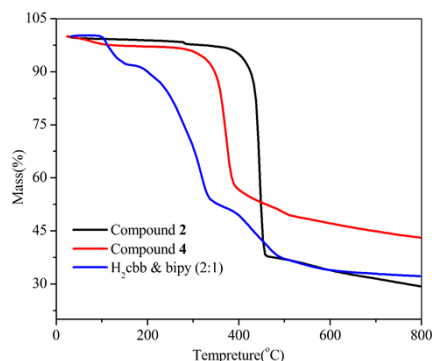

**Fig. S4** View of the TGA plots of **2**, **4** and **H<sub>2</sub>cbb & bipy (2:1)** in nitrogen stream.

TGA of **2** exhibits a plateau of stability up to 380 °C due to no coordinated solvent, then followed by a sharp weight loss induced by the decomposition of the framework. TGA of **4** indicates a preliminary weight loss of 2.7% (calc. 3.1%) from room temperature to 150 °C, corresponding to the release of water molecules, and then followed by a flat plateau from 150 to 350 °C. After that, a sharp weight loss is observed caused by the decomposition of the framework.

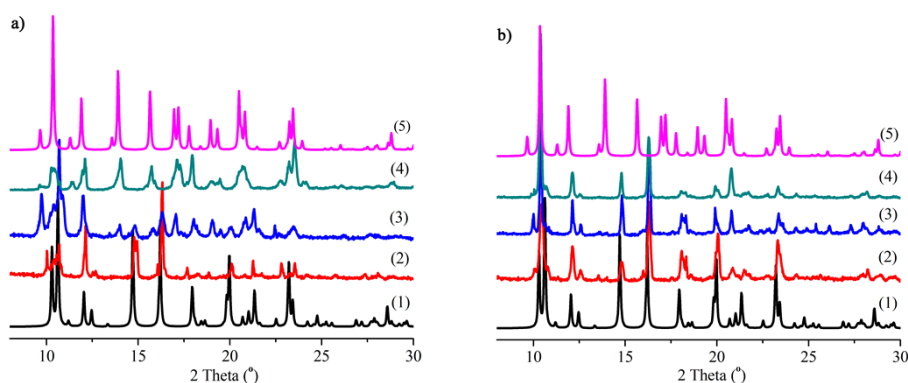

**Fig. S5** View of the reversible solid-state SCSC transformation of **1** and **3**. (a) PXRD patterns of as-simulated **1** (1), the activation of **1** at 50 °C (2), 120 °C (3) and 210 °C (4), and as-simulated **3** (5). (b) PXRD patterns of as-simulated **1** (1), the exposure of activated-samples at 50 °C (2), 120 °C (3) and 210 °C (4) in air for 5 minutes, and as-simulated **3** (5).

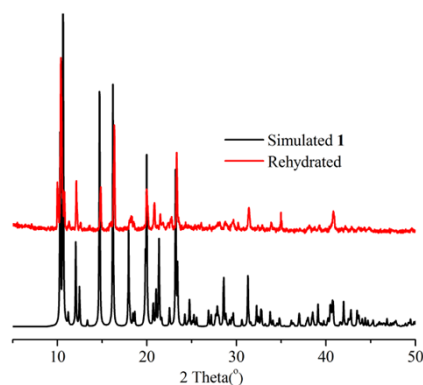

**Fig. S6** The PXRD patterns of as-simulated **1** and the rehydrated sample after ten cycles of the reversible water uptake.

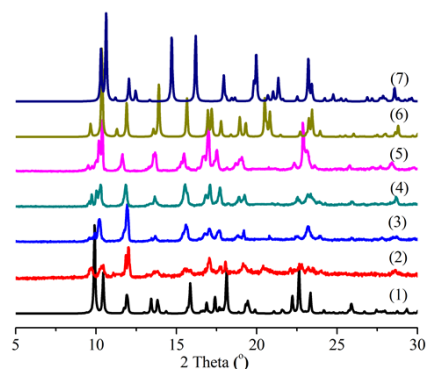

**Fig. S7** PXR D patterns of as-simulated **4** (1), the activation of **4** in water (2), methanol (3), acetonitrile (4) and *N,N'*-dimethylformamide (5), as-simulated **3** (6) and as-simulated **1** (7).

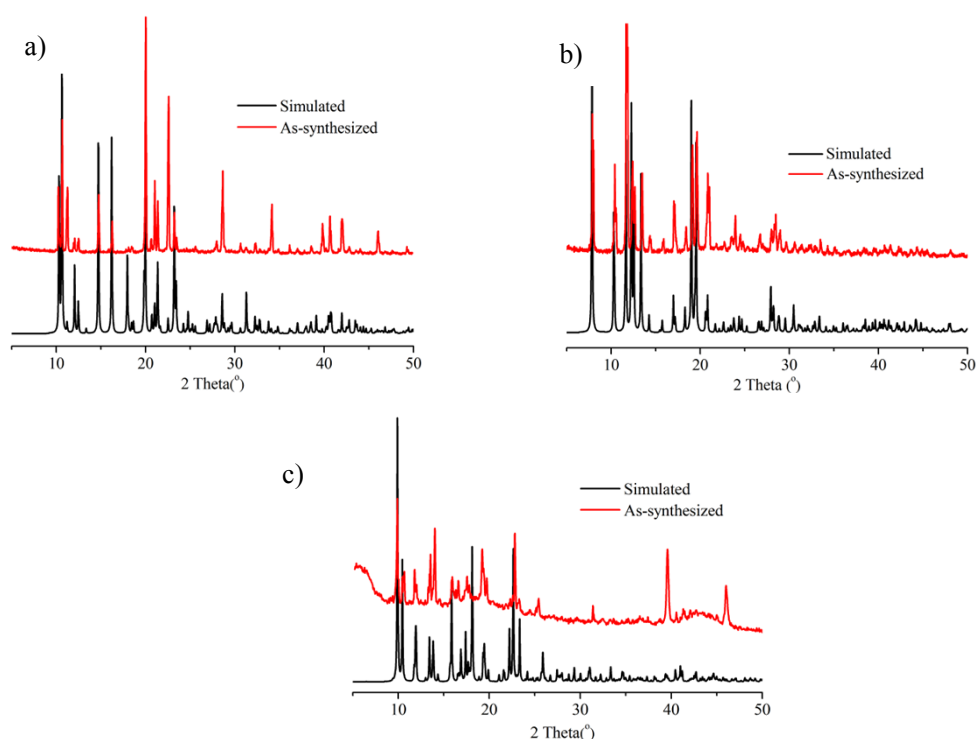

**Fig. S8** The PXR D patterns of **1**(a), **2**(b) and **4**(c) simulated from the X-ray single-crystal structures and as synthesized samples.

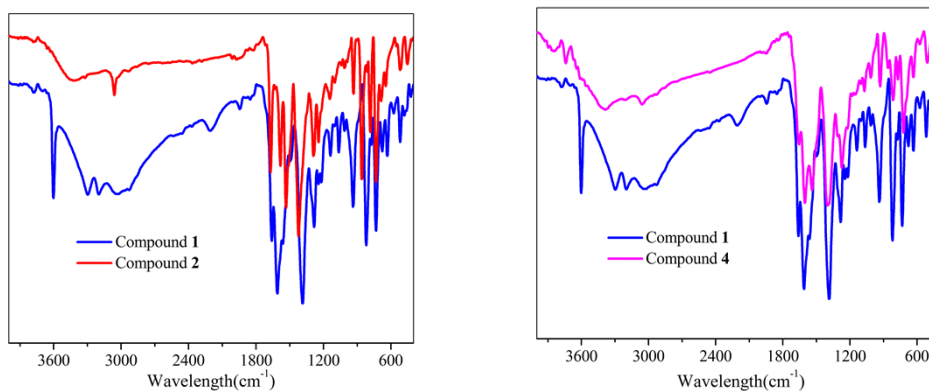

**Fig. S9** View of the IR spectra of **1**, **2** and **4**.

**Table S1.** Selected Bond Lengths (Å) and Bond Angles (deg) for **1-4**.

| Compound 1                      |          |                                 |           |
|---------------------------------|----------|---------------------------------|-----------|
| Ni(1)-N(1)                      | 2.084(5) | O(4) <sup>#3</sup> -Ni(1)-N(1)  | 178.2(2)  |
| Ni(1)-N(2)                      | 2.098(5) | O(2W)-Ni(1)-N(1)                | 88.7(2)   |
| Ni(1)-O(1)                      | 2.043(5) | O(1)-Ni(1)-N(2)                 | 90.9(2)   |
| Ni(1)-O(4) <sup>#3</sup>        | 2.061(4) | O(4) <sup>#3</sup> -Ni(1)-N(2)  | 89.3(2)   |
| Ni(1)-O(2W)                     | 2.067(4) | O(2W)-Ni(1)-N(2)                | 173.6(2)  |
| Ni(1)-O(1W)                     | 2.131(5) | N(1)-Ni(1)-N(2)                 | 89.29(16) |
| Ni(1) <sup>#4</sup> -O(4)       | 2.061(4) | O(1)-Ni(1)-O(1W)                | 173.8(3)  |
| O(1)-Ni(1)-O(4) <sup>#3</sup>   | 89.7(2)  | O(4) <sup>#3</sup> -Ni(1)-O(1W) | 84.31(19) |
| O(1)-Ni(1)-O(2W)                | 80.95    | O(2W)-Ni(1)-O(1W)               | 86.88(19) |
| O(4) <sup>#3</sup> -Ni(1)-O(2W) | 66.33    | N(1)-Ni(1)-O(1W)                | 96.7(2)   |
| O(1)-Ni(1)-N(1)                 | 89.2(2)  | N(2)-Ni(1)-O(1W)                | 87.3(2)   |

Symmetry transformations used to generate equivalent atoms: #1  $x - 1/2, -y + 5/2, z - 1/2$ ; #2  $x + 1/2, -y + 5/2, z + 1/2$ ; #3  $x + 1, y, z$ ; #4  $x - 1, y, z$ .

| Compound 2                    |          |                                              |          |
|-------------------------------|----------|----------------------------------------------|----------|
| Ni(1)-N(1)                    | 2.032(7) | O(1)-Ni(1)-O(5) <sup>#3</sup>                | 87.2(3)  |
| Ni(1)-O(1)                    | 2.003(6) | O(4) <sup>#2</sup> -Ni(1)-O(5) <sup>#3</sup> | 165.8(2) |
| Ni(1)-O(4) <sup>#2</sup>      | 2.005(6) | O(1)-Ni(1)-O(2) <sup>#4</sup>                | 166.0(3) |
| Ni(1)-O(5) <sup>#3</sup>      | 2.005(6) | O(4) <sup>#2</sup> -Ni(1)-O(2) <sup>#4</sup> | 87.4(3)  |
| Ni(1)-O(2) <sup>#4</sup>      | 2.025(6) | O(5) <sup>#3</sup> -Ni(1)-O(2) <sup>#4</sup> | 90.5(3)  |
| Ni(1) <sup>#4</sup> -O(2)     | 2.025(6) | O(1)-Ni(1)-N(1)                              | 99.6(3)  |
| Ni(1) <sup>#2</sup> -O(4)     | 2.005(6) | O(4) <sup>#2</sup> -Ni(1)-N(1)               | 98.3(3)  |
| Ni(1) <sup>#5</sup> -O(5)     | 2.005(6) | O(5) <sup>#3</sup> -Ni(1)-N(1)               | 95.9(3)  |
| O(1)-Ni(1)-O(4) <sup>#2</sup> | 91.5(3)  | O(2) <sup>#4</sup> -Ni(1)-N(1)               | 94.4(3)  |

Symmetry transformations used to generate equivalent atoms: #1  $-x + 1, -y + 2, -z + 2$ ; #2  $-x + 2, -y + 1, -z + 1$ ; #3  $x, y + 1, z$ ; #4  $-x + 2, -y + 2, -z + 1$ ; #5  $x, y - 1, z$ .

| Compound 3                    |          |                                              |          |
|-------------------------------|----------|----------------------------------------------|----------|
| Ni(1)-N(1)                    | 2.096(7) | O(5) <sup>#4</sup> -Ni(1)-O(1)               | 90.6(2)  |
| Ni(1)-N(2)                    | 2.047(7) | N(1)-Ni(1)-O(1)                              | 96.3(3)  |
| Ni(1)-O(5) <sup>#4</sup>      | 2.078(6) | N(2)-Ni(1)-O(2)                              | 94.1(3)  |
| Ni(1)-O(1)                    | 2.141(5) | O(5) <sup>#4</sup> -Ni(1)-O(2)               | 89.2(2)  |
| Ni(1)-O(2)                    | 2.165(7) | N(1)-Ni(1)-O(2)                              | 157.4(3) |
| Ni(1)-O(4) <sup>#4</sup>      | 2.201(6) | O(1)-Ni(1)-O(2)                              | 61.0(2)  |
| O(4)-Ni(1) <sup>#1</sup>      | 2.201(6) | N(2)-Ni(1)-O(4) <sup>#4</sup>                | 110.8(3) |
| O(5)-Ni(1) <sup>#1</sup>      | 2.078(6) | O(5) <sup>#4</sup> -Ni(1)-O(4) <sup>#4</sup> | 61.4(2)  |
| N(2)-Ni(1)-O(5) <sup>#4</sup> | 171.5(3) | N(1)-Ni(1)-O(4) <sup>#4</sup>                | 112.1(3) |
| N(2)-Ni(1)-N(1)               | 89.6(3)  | O(1)-Ni(1)-O(4) <sup>#4</sup>                | 139.0(2) |

|                                |         |                               |         |
|--------------------------------|---------|-------------------------------|---------|
| O(5) <sup>#4</sup> -Ni(1)-N(1) | 90.4(3) | O(2)-Ni(1)-O(4) <sup>#4</sup> | 87.4(3) |
| N(2)-Ni(1)-O(1)                | 97.8(3) |                               |         |

Symmetry transformations used to generate equivalent atoms: #1  $x - 1, y, z$ ; #2  $x + 1/2, -y + 5/2, z + 1/2$ ; #3  $x - 1/2, -y + 5/2, z - 1/2$ ; #4  $x + 1, y, z$ .

| Compound 4                                   |            |                                |            |
|----------------------------------------------|------------|--------------------------------|------------|
| Ni(1) <sup>#1</sup> -O(4)                    | 1.997(3)   | N(1)-Ni(1)-O(2)                | 159.45(12) |
| Ni(1)-O(4) <sup>#1</sup>                     | 1.997(3)   | N(2) <sup>#2</sup> -Ni(1)-O(2) | 87.36(11)  |
| Ni(1)-N(1)                                   | 2.077(3)   | O(4) <sup>#1</sup> -Ni(1)-N(3) | 87.35(12)  |
| Ni(1)-N(2) <sup>#2</sup>                     | 2.114(3)   | N(1)-Ni(1)-N(3)                | 93.69(12)  |
| Ni(1)-O(2)                                   | 2.117(3)   | N(2) <sup>#2</sup> -Ni(1)-N(3) | 173.74(12) |
| Ni(1)-N(3)                                   | 2.143(3)   | O(2)-Ni(1)-N(3)                | 86.55(12)  |
| Ni(1)-O(1)                                   | 2.179(3)   | O(4) <sup>#1</sup> -Ni(1)-O(1) | 157.07(12) |
| N(2)-Ni(1) <sup>#3</sup>                     | 2.114(3)   | N(1)-Ni(1)-O(1)                | 97.88(12)  |
| O(4) <sup>#1</sup> -Ni(1)-N(1)               | 105.04(13) | N(2) <sup>#2</sup> -Ni(1)-O(1) | 87.96(13)  |
| O(4) <sup>#1</sup> -Ni(1)-N(2) <sup>#2</sup> | 91.81(12)  | O(2)-Ni(1)-O(1)                | 61.57(11)  |
| N(1)-Ni(1)-N(2) <sup>#2</sup>                | 92.52(13)  | N(3)-Ni(1)-O(1)                | 90.40(13)  |
| O(4) <sup>#1</sup> -Ni(1)-O(2)               | 95.51(12)  |                                |            |

Symmetry transformations used to generate equivalent atoms: #1  $-x + 2, y, -z + 3/2$ ; #2  $x + 1/2, -y + 1/2, z + 1/2$ ; #3  $x - 1/2, -y + 1/2, z - 1/2$ ; #4  $-x + 1, -y + 1, -z + 1$ .
